# Supplementary material for: Modelling the Species Distribution of Flat-Headed Cats (Prionailurus planiceps), an Endangered South-East Asian Small Felid
Source: PLoS One. 2010 Mar 17;5(3):e9612. doi: 10.1371/journal.pone.0009612 (PMC2840020; doi:10.1371/journal.pone.0009612)
Supplement: Table S1 — Summary of recent and historical records of the flat-headed cat Prionailurus planiceps. (0.04 MB XLS) [file pone.0009612.s001.xls]

## Sheet: Sheet1
Table S1 Summary of recent and historical records of the flat-headed cat Prionailurus planiceps
Country	Locality	Coordinates	Year	Observation	Habitat	Reference
Recent records
Thailand	Phru Toh Daeng Peat Swamp Forest	6°12'N, 101°57'E*		sighting	Peat swamp forest	Nowell & Jackson 1996 [5]; Grassman in litt.; Kanchanasaka in litt.
Malaysia	Selangor Peat Swamp Forest	3°31'N, 101°20'E*		sighting	Peat swamp forest	Carl Traehold unpubl. data
Malaysia	Pahang Peat Swamp Forest	3°31'N, 103°25'E*		sighting	Peat swamp forest	Carl Traehold unpubl. Data; Dennis Yong in litt.
Malaysia	Krau Game Resere	3°43'N, 102°10'E*	2007	sighting	lowland dipterocarp & lowland riverine	Chris Shepherd in litt.; Dennis Yong in litt.
Malaysia	Borneo, Sabah, Tabin WR	5°12’N, 118°35’E	2002	camera-trapping	Selectively logged forest, totally protected	Yasuda et al. 2007 [60]
Malaysia	Borneo, Sabah, Deramakot FR	5°26'N, 117°25'E	2009	camera-trapping	Selectively logged forest, close to water resources	Mohamed et al. 2009 [61]
Malaysia	Borneo, Sabah, Deramakot FR	5°26'N, 117°23'E	2009	camera-trapping	Selectively logged forest, close to water resources	Mohamed et al. 2009 [61]
Malaysia	Borneo, Sabah, Deramakot FR	5°25'N, 117°24'E	2009	camera-trapping	Selectively logged forest, close to water resources	Mohamed et al. 2009 [61]
Malaysia	Borneo, Sabah, Tangkulap FR	5°29'N, 117°15'E	2009	camera-trapping	Selectively logged forest, close to water resources	AW & AM unpubl. Data
Malaysia	Borneo, Sabah, Tangkulap FR	5°26'N, 117°14'E	2009	camera-trapping	Selectively logged forest, close to water resources	AW & AM unpubl. data
Malaysia	Borneo, Sabah, Tangkulap FR	5°28'N, 117°13'E	2009	camera-trapping	Selectively logged forest, close to water resources	AW & AM unpubl. data
Malaysia	Borneo, Sabah, Malua FR	5°11'N, 117°28'E*	2009	sighting	Along the Malua river	Marc Ancrenaz in litt.
Malaysia	Borneo, Sabah, Danum Valley CA	5°01'N, 117°48'E	2008	camera-trapping	Primary forest 300 m of Danum Valley Field Centre	AJH & JR unpubl. data
Malaysia	Borneo, Sabah, Kinabatangan WS	5°27'N, 118°15'E	2008	sighting & film	Selectively logged, along a tributary of the Kinabatangan floodplain	Wilting & Mohamed Supplemental video
Malaysia	Borneo, Sabah, Kinabatangan WS	5°30'N, 118°16'E*	2005	sighting	Selectively logged, along the Menanggol river	Magnus Gagnelid in litt.
Malaysia	Borneo, Sabah, Maliau Basin CA	4°44'N, 116°58'E*	2000	sighting & photograph	Primary forest	Carl Traehold unpubl. data
Malaysia	Borneo, Sabah, Padas Damit FR	5°20' N, 115°30'E*	2001	sighting	Seasonal lake edge	Anthony Sebastian in litt.
Malaysia	Borneo, Sabah, Nabawan village	5°06'N, 116°57'E	2000	trapped	Hook trap close to Nabawan village	Andrew Kitchener in litt.
Malaysia	Borneo, Sarawak, Bukit Sarang CA	2°39'N, 113°03'E*	2005	camera-trapping	Peat swamp forest	Belden Giman Azizan Grand Perfect Sdn Bhd,
Malaysia	Borneo, Sarawak, Bukit Sarang CA	2°39'N, 113°03'E*		captive	Peat swamp forest	Dennis Yong in litt.
Malaysia	Borneo, Sarawak, Loagan Bunut NP	3°45'N, 114°13'E*			Wetland habitat, freshwater swamp, riverine forests	Povey et al. 2009 [27], Sarawak Forestry Department
Malaysia	Borneo, Sarawak, Sadong Swamp Forest	1°20'N, 110°45'E*			Swamp forest	Asean Regional Centre for Biodiversity Conservation
Malaysia	Borneo, Sarawak, Kuala Niah Sibuti coast	3°57'N, 113°42'E*	2002	skinned specimen	Sandy coastal shrub, close to Niah National park	Anthony Sebastian in litt.
Malaysia	Borneo, Sarawak, Niah NP	3°49'N, 113°45'E*	2002	sighting	Karst-sided stream	Anthony Sebastian in litt.
Malaysia	Borneo, Sarawak, Similajau NP	3°20'N, 113°10'E*	2003	sighting	Pandanus-lined freshwater stream, Peat-swamp forest	Anthony Sebastian in litt.
Malaysia	Borneo, Sarawak, Samunsam WS	1°57'N, 109°37'E*	1986	sighting	Along the stream	Anthony Sebastian in litt.
Malaysia	Borneo, Sarawak, Lanjak Entimau WS	1°39'N, 112°14'E*		interview	Primary, secondary & mixed dipterocarp	MAJ questionnaire
Malaysia	Borneo, Sarawak, Maludam NP	1°05'N, 111°09'E*		interview	Peat swamp forest	MAJ questionnaire
Malaysia	Borneo, Sarawak, Sebangkoi Council Park	1°57'N, 111°26'E*		interview	Secondary dipterocarp	MAJ questionnaire
Malaysia	Borneo, Sarawak, Bako NP	1°43'N, 110°28'E*		interview	Primary, secondary & mixed dipterocarp	MAJ questionnaire
Malaysia	Borneo, Sarawak, Matu	2°42'N, 111°35'E*		interview	Peat swamp forest & Secondary dipterocarp	MAJ questionnaire
Malaysia	Borneo, Sarawak, Kapit region	1°31'N, 113°09'E*		interview	Village at the Rajang river	MAJ questionnaire
Brunei	Borneo, Tasek Merimbun Heritage Park	4°36’N, 114°40’E	2003	camera-trapping	Secondary forest, lake Tasek Merimbun	Yasuda et al. 2007 [60]
Brunei	Borneo, Bukit Kukub	4°42’N, 114°36’E*			Lowland mixed dipterocarp forest	Samhan in litt.
Brunei	Borneo, Belait Swamp Forest	4°27’N, 114°20’E*	1997	sighting	Swamp forest along a stream	Anthony Sebastian in litt.
Indonesia	Borneo, Kalimantan, Sumalindo Lestari Jaya II	1°08'N, 115°16'E	2005	Sighting	Recently selectively logged close to a stream	Meijaard et al. 2005 [64]
Indonesia	Borneo, Kalimantan, Sungai Wain Protection Forest	1°09’S, 116°50’E*	2005	Camera-trapping	Primary forest	Yasuda et al. 2007 [60]
Indonesia	Borneo, Kalimantan, Bukit Soeharto	0°50'S, 117°8'E*		Sighting	Protection area in the forest near a river	Yasuma 1994 [65]
Indonesia	Borneo, Kalimantan, Sungai Kayan Mentarang NP	2°52'N, 115°49'E*		sighting	Along a stream	Wulffraat in litt.
Indonesia	Borneo, Kalimantan, Sungai Kayan Mentarang NP	3°00'N, 115°22'E*	2004	hunted specimen	2nd order stream, hill dipterocarp forest	Anthony Sebastian in litt.
Indonesia	Borneo, Kalimantan, Kutai National Park	0°16'N, 117°06'E*	before 1997		Lowland rainforest	Sahat July Tirta Dewi in litt.
Indonesia	Borneo, Kalimantan, Sabangau Peat Swamp Forest	2°19'S, 113°54'E	2009	camera-trapping & sighting	Lowland peat-swamp	Cheyne et al. 2009 [63], SC unpubl. data
Indonesia	Borneo, Kalimantan, Sabangau Peat Swamp Forest	2°20'S, 113°53'E	2009	camera-trapping & sighting	Lowland peat-swamp	Cheyne et al. 2009 [63], SC unpubl. data
Indonesia	Borneo, Kalimantan, Sabangau Peat Swamp Forest	2°19'S, 113°53'E	2009	camera-trapping & sighting	Lowland peat-swamp	Cheyne et al. 2009 [63], SC unpubl. data
Indonesia	Borneo, Kalimantan, Gunung Palung NP	1°15'S, 110°4'E*		sightings	Lowland dipterocarp & peatswamp forest	Tim Laman in litt.
Indonesia	Borneo, Kalimantan, Danau Sentarum WR	1°51'S, 112°6'E*	1998-1999	numerous sightings	Inland floodplain lakes	Anthony Sebastian in litt.
Indonesia	Borneo, Kalimantan, Tanjung Puting NP	2°56'S, 112°2'E*	1986	sighting	Peat swamp forest along a creek	Anthony Sebastian in litt.
Indonesia	Sumatra, Way Kambas National Park	4°55'S, 105°45'E*	1996	Camera-trapping	Old secondary lowland forest	Soemarson 1996 [57]
Indonesia	Sumatra, Merang River	1°59'S, 104°00'E	1995	sighting	Dry secondary, forest shrub, along the Merang river	Bezuijen 2000 [6]
Indonesia	Sumatra, Merang River	1°58'S, 103°59'E	2002	sighting	Dry secondary, forest shrub, along the Merang river	Bezuijen 2003 [58]
Indonesia	Sumatra, Merang River	1°55'S, 103°58'E	2002	sighting	Dry secondary, forest shrub, along the Merang river	Bezuijen 2003 [58]
Indonesia	Sumatra, Berbak National Park, Jambi Province	1°25'S, 104°22'E	1996	Dead specimen	Primary freshwater swamp forest	Bezuijen 2000 [6]
Indonesia	Sumatra, Senepis Buluhala CA	1°49'N, 101°00'E*	2005	camera-trapping	Peat swamp & lowland forest	Sumatran Tiger Conservation Project
Indonesia	Sumatra, Batang Gadis	0°25'N, 99°10'E*			Lowland rainforest	Barita (in IUCN Red List)
Indonesia	Sumatra, Kerinci Seblat NP	2°25'S, 101°29'E *		sighting	Submontane & lowland rainforest, upland peat swamp	Matthew Linkie (in IUCN red list), Debbie Martyr in litt.
Indonesia	Sumatra, Gunung Leuser NP	2°24'N, 97°50'E*			Lowlands of the NP	UNEP-WCMC 2004 [66]
Indonesia	Sumatra, Riau Province Forest patch close to Duta Palm	0°29'S, 102°37'E*	2007	trapped	Forest patch between river & oil-palm plantation. Cat was in a poor condition.	Veerle Dossche in litt.
Indonesia	Sumatra, Tapan area (now converted to oil palm)	2°9'S, 101°1'E*	before 1997		Good swamp forest, today converted to palm oil plantation	Debbie Martyr in litt.
Indonesia	Sumatra, Jambi lowlands	1°31'S, 102°28'E*	1997	captive	Lowland forest, with a good network of rivers	Debbie Martyr in litt.
Indonesia	Sumatra, Suak, Aceh	3°04′N, 97°26′E*		Camera-trapping	Peat swamp & lowland forest	Gabriella M. Fredriksson in litt.
Historical records				Collector	Museum Code	Reference
Thailand	Bangnara, Pattani, Peninsula Siam	6°42'N, 101°23'E*	1915	C.J.Aagaard	ZRC. 4.1058	Bezuijen 2000 [6]
Malaysia	Kauantan, Pahang	3°56'N, 103°22'E*				Lim & Abdul Rahman 1961 [67]
Malaysia	Sungai Rompin, Petah Forest Reserve, Kampong Kediah	2°53'N, 103°17'E*	1970	Lim & Muul	USNH 489420	Muul & Lim 1970 [1]
Malaysia	Sungei Buloh Forest Reserve, Bukit Lanjan, Selangor	3°14'N, 101°45'E*	1970	Lim & Muul	USNH 489421	Muul & Lim 1970 [1]
Malaysia	Sungei Buloh Forest Reserve, Bukit Lanjan, Selangor	3°14'N, 101°45'E*	1970	Lim & Muul	USNH 489422	Muul & Lim 1970 [1]
Malaysia	Jugra Hill, Kuala Langat, Selangor	2°55'N, 101°34'E*	1971	Lim & Muul	USNH 489423
Malaysia	Jugra Hill, Kuala Langat, Selangor	2°55'N, 101°34'E*	1971	Lim & Muul	USNH 489424
Malaysia	Jugra Hill, Kuala Langat, Selangor	2°55'N, 101°34'E*	1971	Lim & Muul	USNH 489425
Malaysia	Jugra Hill, Kuala Langat, Selangor	2°55'N, 101°34'E*	1971	Lim & Muul	USNH 489426
Malaysia	Jugra Hill, Kuala Langat, Selangor	2°55'N, 101°34'E*	1971	Lim & Muul	USNH 489427
Malaysia	Jugra Hill, Kuala Langat, Selangor	2°55'N, 101°34'E*	1971	Lim & Muul	USNH 489428
Malaysia	Selangor	3°29'N, 101°31'E*			ZRC. 4.1059	Bezuijen 2000 [6]
Malaysia	Johore (Johor State of Malaysia)	1°56'N, 103°21'E*	1921	Heng Ah Leck	ZRC. 4.1060	Bezuijen 2000 [6]
Malaysia	Malaka	2°13'N, 102°14'E*	1864	Baumgarten	ZMB 74420
Malaysia	Borneo, Sarawak, Saribas District	1°40'N, 111°15'E*				Medway 1965 [68]
Malaysia	Borneo, Sarawak, Saribas District	1°40'N, 111°15'E*	1925		SMK0191/5	Azlan et al. 2007 [69]
Malaysia	Borneo, Sarawak, Baram District	4°34'N, 113°59'E*	1891	Hose	ZRC. 4.1064	Bezuijen 2000 [6]
Malaysia	Borneo, Sarawak, Baram District	4°34'N, 113°59'E*	1891	Hose	SMK0191/9	Azlan et al. 2007 [69]
Malaysia	Borneo, Sarawak, Gunung Dulit	3°20'N, 114°07'E*				Medway 1965 [68]
Malaysia	Borneo, Sarawak, Marabok river	4°55'N, 115°26'E*	1899	Rolle	RMNH N/A
Malaysia	Borneo, Sarawak, Tabuan River (today part of Kuching)	1°32'N, 110°22'E*	1907		SMK0191/4	Azlan et al. 2007 [69]
Malaysia	Borneo, Sarawak, Maong river (today part of Kuching)	1°31'N, 110°20'E*	1915		SMK0191/8	Azlan et al. 2007 [69]
Malaysia	Borneo, Sarawak, foot of Mt. Pueh	1°46'N, 109°44'E*	1924		SMK0191/6	Azlan et al. 2007 [69]
Malaysia	Borneo, Sarawak, Telok Paoh Sadong River, Simunjan	1°24'N, 110°44'E*	1957		SMK N/A	Azlan et al. 2007 [69]
Malaysia	Borneo, Sarawak, Matu	2°42'N, 111°35'E*	1898	Phillips	SMK0191/7	Azlan et al. 2007 [69]
Indonesia	Borneo, Kalimantan, Sungai Kendawangan	2°31'S, 110°13'E*	1908	Abbott, W. L.;	USMN 153849
Indonesia	Borneo, Kalimantan, Sungai Kenepai	0°35'N, 111°55'E*	1893	Büttikofer	RMNH 12438	Medway 1965 [68]
Indonesia	Borneo, Kalimantan, Sungai Kapuas	3°02'S, 114°03'E*				Medway 1965 [68]
Indonesia	Borneo, Kalimantan, Sempang River	1°03'S, 110°05'E*	1907	Abbott, W. L.;	USMN 145592
Indonesia	Borneo, Kalimantan, Sempang River	1°03'S, 110°05'E*	1907	Abbott, W. L.;	USMN 145593
Indonesia	Borneo, Kalimantan, Sempang River	1°03'S, 110°05'E*	1907	Abbott, W. L.;	USMN 145594
Indonesia	Borneo, Kalimantan, Sempang River	1°03'S, 110°05'E*	1907	Abbott, W. L.;	USMN 145595
Indonesia	Borneo, Kalimantan, Sempang River	1°03'S, 110°05'E*	1907	Abbott, W. L.;	USMN A49973
Indonesia	Borneo, Kalimantan, Sepah River	2°10'N, 117°30'E*	1912	Raven, H. C.;	USMN 196603
Indonesia	Borneo, Kalimantan, Sepah River	2°10'N, 117°30'E*	1912	Raven, H. C.;	USMN 196604
Indonesia	Borneo, Kalimantan, Sepah River	2°10'N, 117°30'E*	1912	Raven, H. C.;	USMN 196605
Indonesia	Borneo, Kalimantan, Sepah River	2°10'N, 117°30'E*	1912	Raven, H. C.;	USMN 196607
Indonesia	Borneo, Kalimantan, Mahakam River, Lo Ban Ban	0°02'N, 116°20'E*	1912	Raven, H. C.;	USMN 196606
Indonesia	Borneo, Kalimantan, Pontianak	0°02'S, 109°21'E*	1897	Mayer	SMNS 2268
Indonesia	Borneo, Kalimantan, Pontianak	0°02'S, 109°21'E*	1897	Mayer	SMNS 2269
Indonesia	Borneo, Kalimantan, Kota Bangun, Mahakam River	0°14'S, 116°33'E*	1927	Sody	RMNH 33706
Indonesia	Sumatra, Little Siak River	1°01'N, 102°06'E*	1906	Abbott, W. L.;	USMN 144116
Indonesia	Sumatra, Palembang	2°41'S, 104°35'E*	1924	via Tiergarten Rotterdam	RMNH 1334
Indonesia	Sumatra, Deli (Medan)	3°46'N, 98°40'E*	1885	Hagen	RMNH Sk. B
Indonesia	Sumatra, Palembang	2°41'S, 104°35'E*	1924	W.L.S.Basapa	ZRC. 4.1061	Bezuijen 2000 [6]
Indonesia	Sumatra, Indragiri, Siak, Sumatra	0°27'N, 102°14'E*	1928	W.L.S.Basapa	ZRC. 4.1062	Bezuijen 2000 [6]
Indonesia	Sumatra, Indragiri, Siak, Sumatra	0°27'N, 102°14'E*	1930	Xavier	ZRC. 4.1063	Bezuijen 2000 [6]
* as no precise locality was available, the geographical coordinates were estimated (see methods)
